# Supplementary material
Source: HighWire-hosted journal article supplement (https://erj.ersjournals.com/content/60/5/2200947)

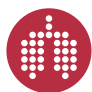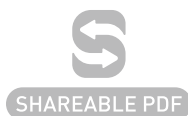

# Impact of the COVID-19 pandemic on influenza and respiratory syncytial virus antibody titres in the community: a prospective cohort study in Neustadt, Thuringia, Germany

Mathias W. Pletz <sup>1,2</sup>, Ralf Dürrwald <sup>3</sup>, Janine Reiche<sup>3</sup>, Norman Rose<sup>1</sup>, André Scherag<sup>2,4</sup> and Sebastian Weis<sup>1,5</sup> for the CoNAN study group

<sup>1</sup>Institute of Infectious Diseases and Infection Control, Jena University Hospital—Friedrich Schiller University, Jena, Germany. <sup>2</sup>Center for Sepsis Care and Control (CSCC), Jena University Hospital—Friedrich Schiller University, Jena, Germany. <sup>3</sup>Department of Infectious Diseases, Unit 17, Influenza and Other Respiratory Viruses, National Influenza Centre and Consultant Laboratory for RSV, PIV and HMPV, Robert Koch Institute, Berlin, Germany. <sup>4</sup>Institute of Medical Statistics, Computer and Data Sciences, Jena University Hospital—Friedrich Schiller University, Jena, Germany. <sup>5</sup>Leibniz Institute for Natural Product Research and Infection Biology, Hans Knöll Institute (HKI), Jena, Germany.

Corresponding author: Mathias W. Pletz ([mathias.pletz@med.uni-jena.de](mailto:mathias.pletz@med.uni-jena.de))

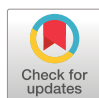

Shareable abstract (@ERSpublications)

**The lack of circulation of influenza and RSV during the COVID-19 pandemic did not result in a substantial drop in respective antibody levels in the community over 12 months** <https://bit.ly/3qXVLId>

**Cite this article as:** Pletz MW, Dürrwald R, Reiche J, *et al.* Impact of the COVID-19 pandemic on influenza and respiratory syncytial virus antibody titres in the community: a prospective cohort study in Neustadt, Thuringia, Germany. *Eur Respir J* 2022; 60: 2200947 [DOI: 10.1183/13993003.00947-2022].

This single-page version can be shared freely online.

Copyright ©The authors 2022.

This version is distributed under the terms of the Creative Commons Attribution Non-Commercial Licence 4.0. For commercial reproduction rights and permissions contact [permissions@ersnet.org](mailto:permissions@ersnet.org)

Received: 8 May 2022  
Accepted: 16 Sept 2022

*To the Editor:*

The coronavirus disease 2019 (COVID-19) pandemic, and the subsequent infection control measures, has led to a substantial shift in the spectrum of respiratory tract infections. In many regions, severe acute respiratory syndrome coronavirus 2 (SARS-CoV-2) was or still is the most common viral respiratory pathogen while the circulation of influenza and respiratory syncytial virus (RSV) was decreased [1–3]. There is some evidence from the past that an interruption of viral circulation for several years may reduce the immunity of the population and lead to a consecutive severe season, as observed in the 2017–2018 season that was dominated by influenza B lineage Yamagata, which was barely present in the previous 5 years [4, 5].

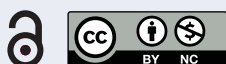

Supplement: inline-supplementary-material-1 [file inline-supplementary-material-1.pdf]
